# Supplementary material for: Nanocluster Mediated Photothermia Improves Eradication Efficiency and Antibiotic Sensitivity of Helicobacter Pylori
Source: Research Square preprint supplement (doi:10.21203/rs.3.rs-1169549/v2), 2022-01-10
Supplement: Supplementary file 1 [file 1f9beb98d45c191e571c6961.docx]

**Supplementary Figure**


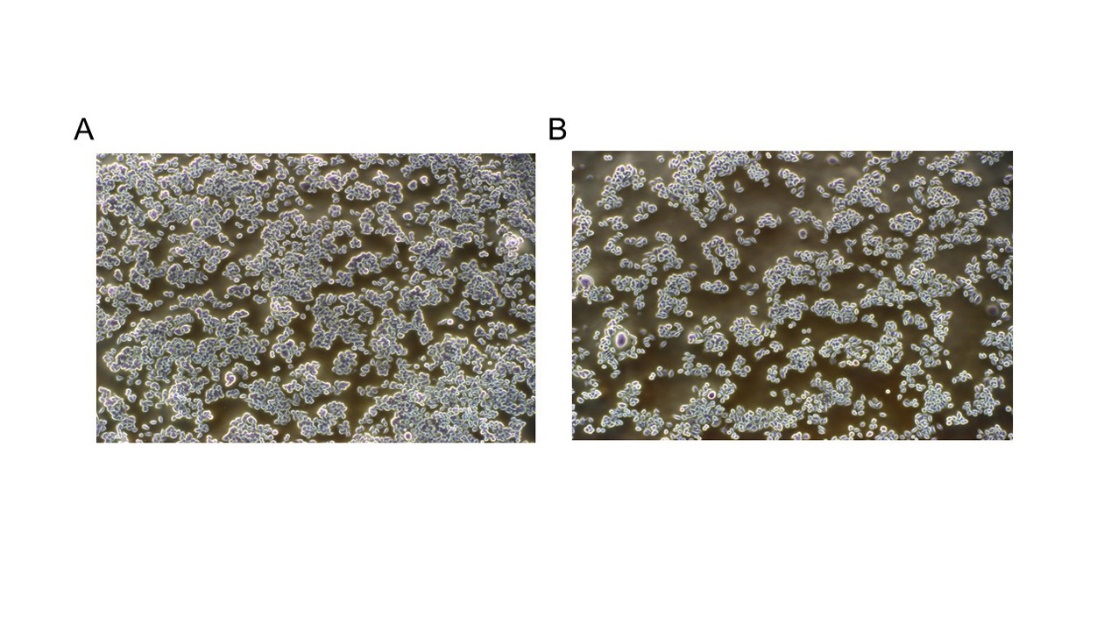


**Fig. S1** Effects of NCs on BGC-823 cells growth. NCs were added into the culture medium and cells were observed by inverted microscope (40×) after co-culturing for 48 h. (**A**) Control group; (**B**) NCs (300 μg/mL) group exhibited significant growth inhibition of BGC-823 cells.


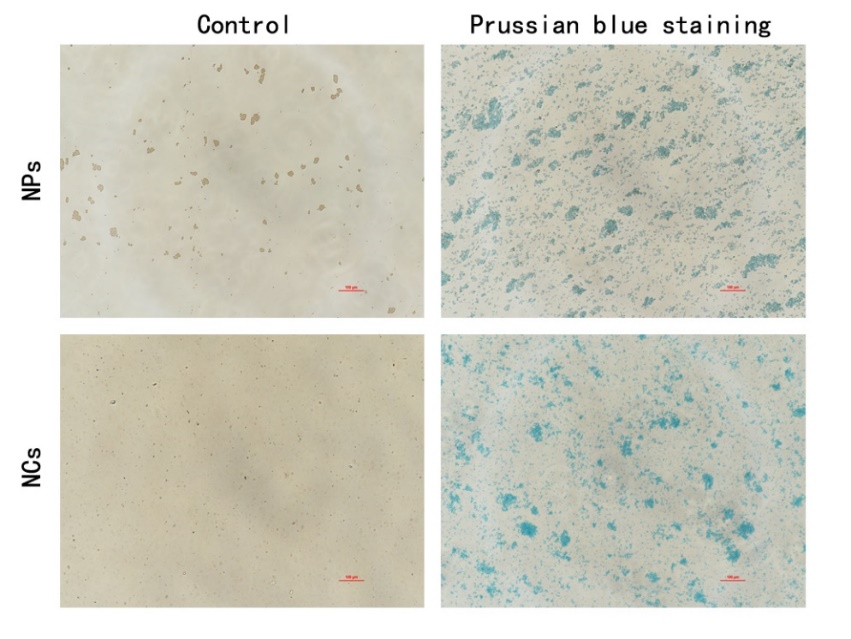


**Fig. S2** Prussian blue staining of NPs and NCs. NPs and NCs were incubated with Prussian blue for 12h, then washed and observed. NPs/NCs in the control group (no incubation) showed brownish grey. After incubation with Prussian blue, both NPs and NCs were stained blue (400×).


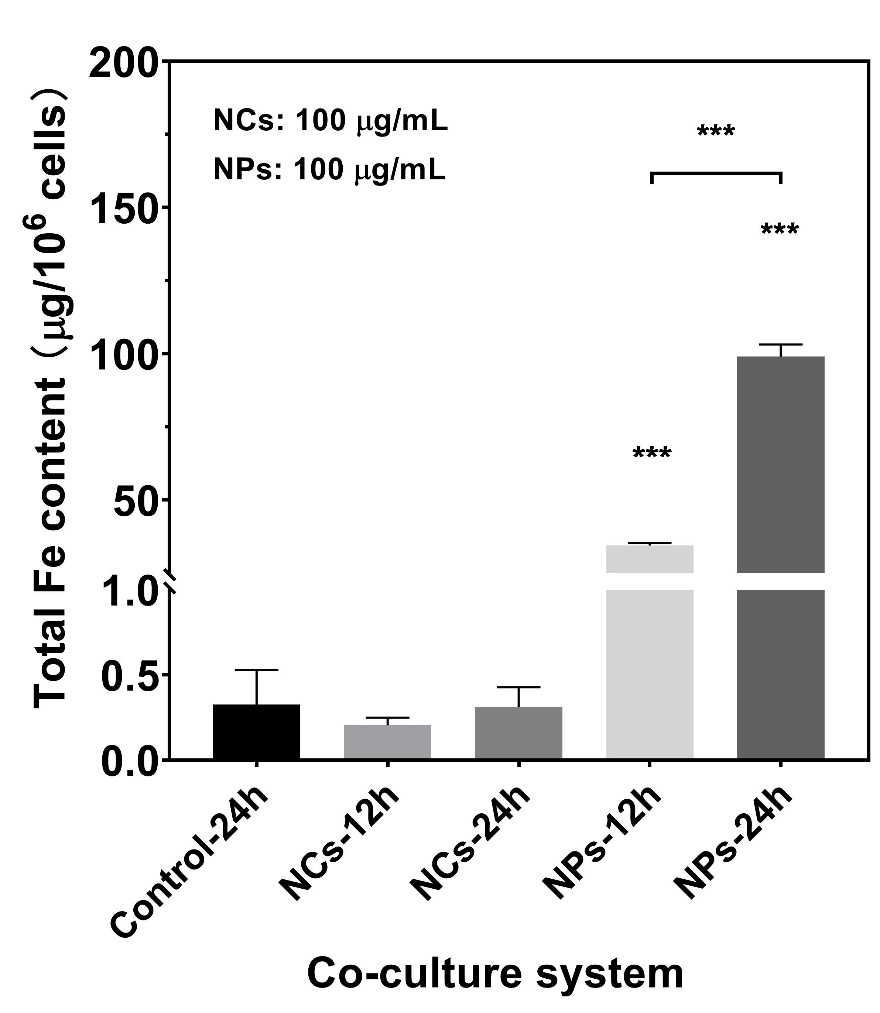


**Fig. S3** Cellular uptake of NPs/NCs in co-cultured BGC-823 cells as quantitatively determined by ICP-MS. *** *p* < 0.001, vs. the control group, n = 3. When co-cultured with NCs, no significant difference was found compared to the control group in Fe content. However, when co-cultured with NPs, a significant increase in Fe content was measured for all exposure time.


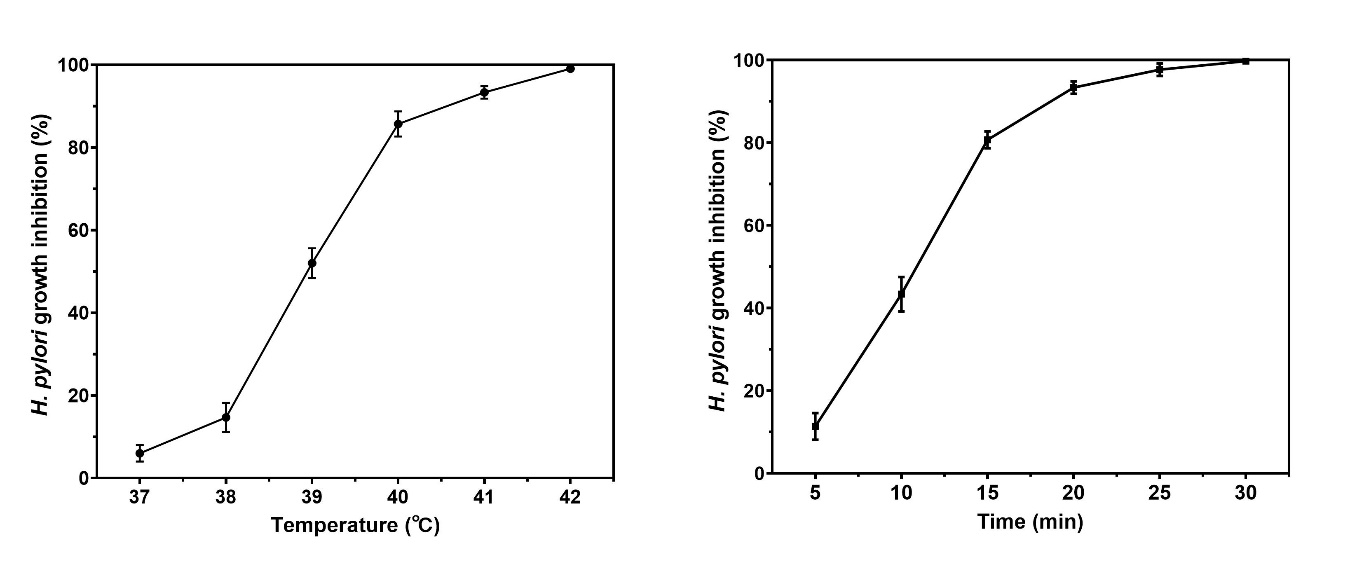


**Fig. S4** Effect of Zn0.3Fe2.7O4 NCs (50 μg/mL) photothermia on *H. pylori* growth inhibition. Percentage of *H. pylori* growth inhibition (**A**) as a function of temperature, t = 20 min; (**B**) as a function of time, temperature = 41 °C.


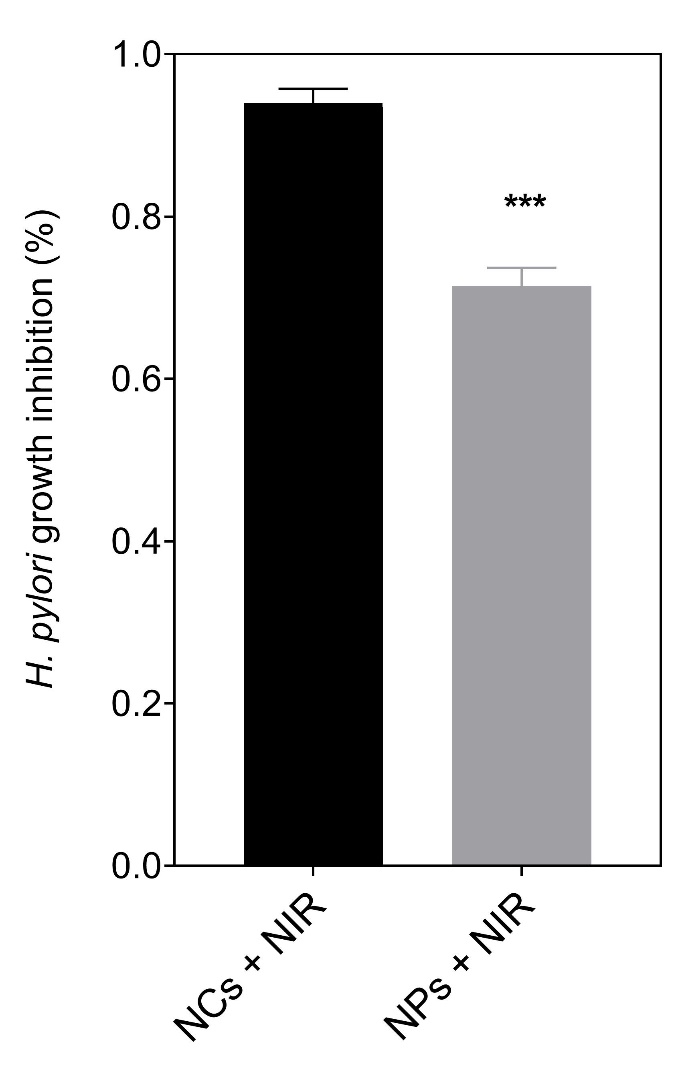


**Fig. S5** Comparison of *H. pylori* NCTC 11637 growth inhibition between NPs and NCs heating. NCs (50 µg/mL) group showed higher growth inhibition rate (%) than NPs (50 µg/mL) group after heating induced by NIR laser to 41℃ for 20 min (n=3).


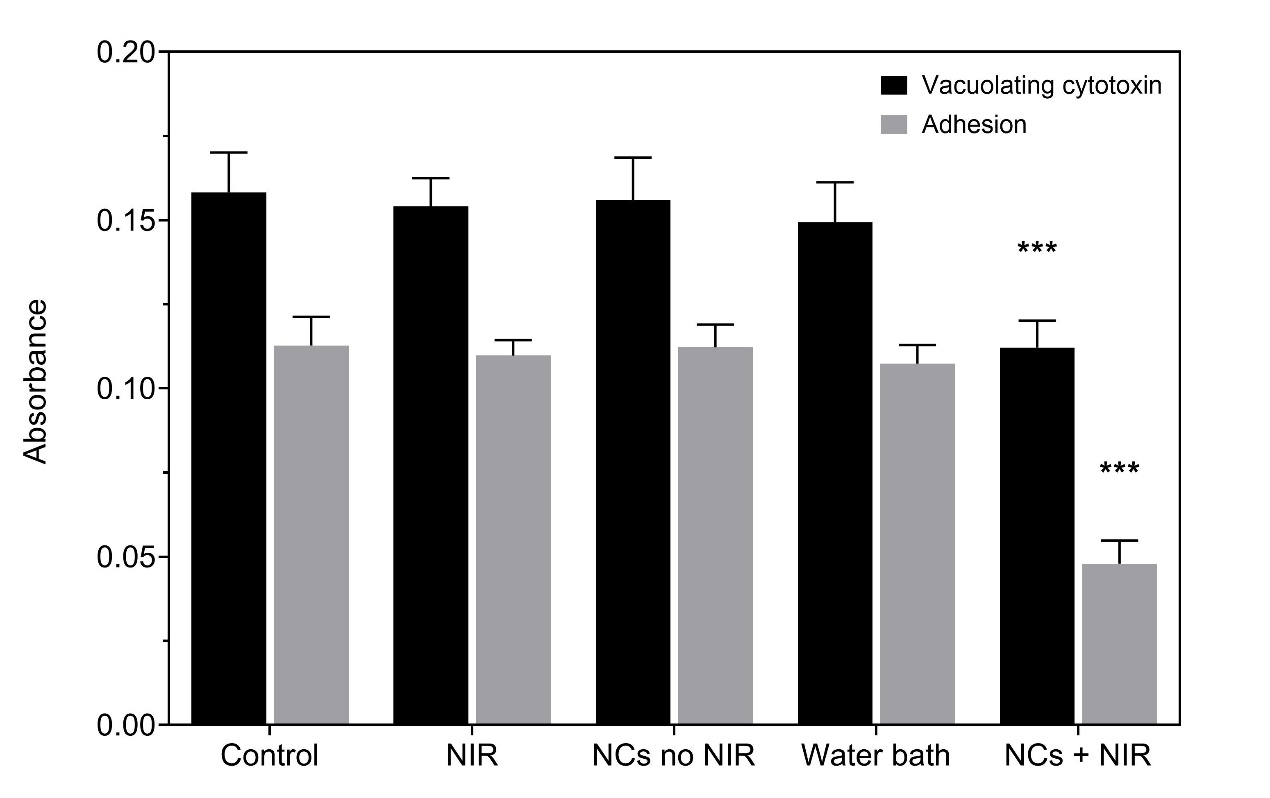


**Fig. S6** Effects of NCs heating on *H. pylori* NCTC 11637 vacuolization and adhesion ability. Under the near-infrared (808nm) irradiation to 41℃ for 20 min, the NCs+heating group showed significant inhibition of vacuolization and adhesion ability, compared with control group (*** P<0.001). The near infrared group, NCs no heating group and water bath (41℃) group showed no difference (n=5).


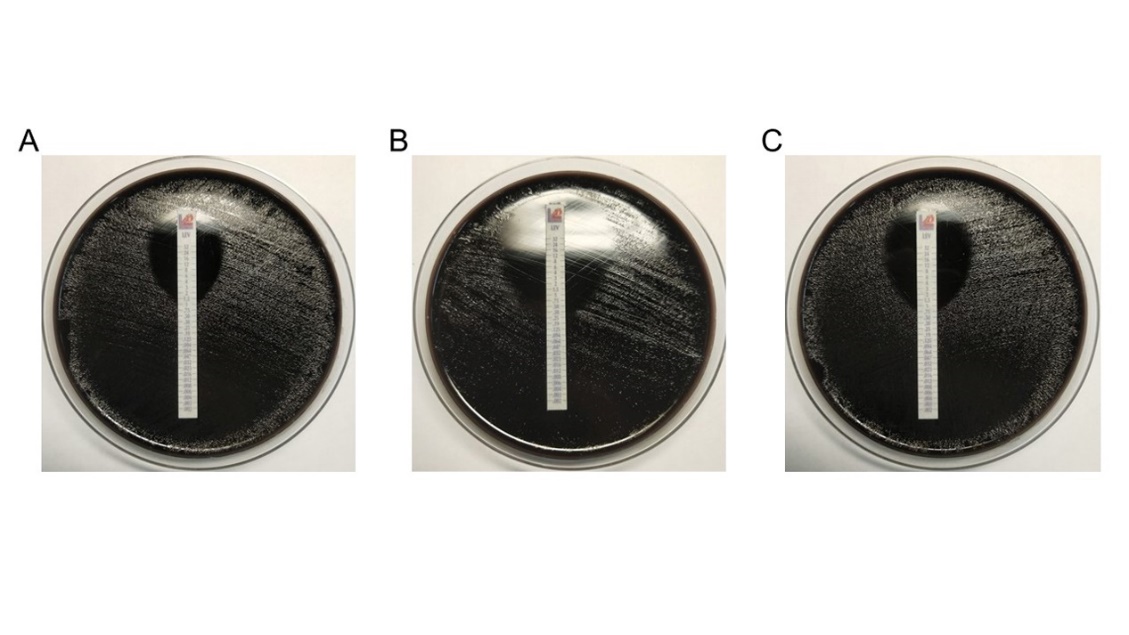


**Fig. S7** Changes of *H. pylori* NCTC 11637 antibiotic susceptibility to levofloxacin. The minimum inhibitory concentration (MIC) for levofloxacin was 1.4 µg/ml in control group (**A**), 0.3 µg/mL in the NPs heating group (**B**), and 0.8 µg/mL in the NCs heating group (**C**).
